# Supplementary material for: CRP genotype and haplotype associations with serum C-reactive protein level and DAS28 in untreated early rheumatoid arthritis patients
Source: PubMed Central journal article supplement (PMC4247621; doi:10.1186/s13075-014-0475-3), 2014-10-31
Supplement: 13075_2014_475_MOESM1_ESM.pdf [file 13075_2014_475_MOESM1_ESM.pdf]

**Supplementary table 1.** Assay information for the 7 SNPs genotyped in 315 early RA patients

| rs number  | Assay id                 | Forward Primer                      | Reverse Primer                     | VIC Probe          | FAM probe           |
|------------|--------------------------|-------------------------------------|------------------------------------|--------------------|---------------------|
| rs11265257 | C__11624376_10           |                                     |                                    |                    |                     |
| rs1130864  | C__7479332_10            |                                     |                                    |                    |                     |
| rs1205     | C__7479334_10            |                                     |                                    |                    |                     |
| rs1800947  | C__177490_10             |                                     |                                    |                    |                     |
| rs3093077  | C__32343424_10           |                                     |                                    |                    |                     |
| rs876538   | C__7479344_10            |                                     |                                    |                    |                     |
| rs2808632  | custom-designed<br>assay | 5'-<br>TGGTACCAGGATAGTGGGA<br>TACTG | 5'-<br>TTCCAAGCTTTCCACATCT<br>TCCT | 5'-TCTGCCCTAGTTGGT | 5'-TCTGCCCATAGTTGGT |

Data on the forward and reverse primers regarding the not custom-designed assays are not available for commercial reasons.
