# Supplementary material for: CRP genotype and haplotype associations with serum C-reactive protein level and DAS28 in untreated early rheumatoid arthritis patients
Source: PubMed Central journal article supplement (PMC4247621; doi:10.1186/s13075-014-0475-3), 2014-10-31
Supplement: 13075_2014_475_MOESM2_ESM.pdf [file 13075_2014_475_MOESM2_ESM.pdf]

**Supplementary table 2.** Genotype data on Hardy-Weinberg equilibrium and minor allele frequency on the combined cohort.

| rs-nr      | Position  | Observed<br>heterozygosity | Predicted<br>heterozygosity | Hardy-Weinberg<br>equilibrium p value | Successful<br>genotyped % | Minor allele<br>frequency | Major:Minor<br>allele <sup>#</sup> |
|------------|-----------|----------------------------|-----------------------------|---------------------------------------|---------------------------|---------------------------|------------------------------------|
| rs2808632  | 159687373 | 0.472                      | 0.434                       | 0.163                                 | 100                       | 0.318                     | T:G                                |
| rs1800947  | 159683438 | 0.117                      | 0.110                       | 0.653                                 | 100                       | 0.059                     | C:G                                |
| rs1130864  | 159683091 | 0.421                      | 0.424                       | 0.966                                 | 100                       | 0.305                     | G:A                                |
| rs1205     | 159682233 | 0.446                      | 0.434                       | 0.751                                 | 99.4                      | 0.318                     | C:T                                |
| rs3093077  | 159679636 | 0.098                      | 0.094                       | 0.921                                 | 99.7                      | 0.049                     | A:C                                |
| rs876538   | 159675717 | 0.376                      | 0.350                       | 0.260                                 | 99.4                      | 0.226                     | C:T                                |
| rs11265257 | 159668984 | 0.472                      | 0.476                       | 0.932                                 | 100                       | 0.391                     | C:T                                |

<sup>#</sup>Nucleotides are given according to the plus strand.
